# Supplementary material
Source: PubMed Central journal article supplement (PMC2740911)
Supplement: NIHMS137442-supplement-supplemental_data.pdf [file NIHMS137442-supplement-supplemental_data.pdf]

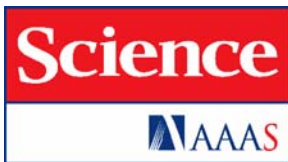

## Supporting Online Material for

### **Clonal Integration of a Polyomavirus in Human Merkel Cell Carcinoma**

Huichen Feng, Masahiro Shuda, Yuan Chang, \* Patrick S. Moore\*

\*To whom correspondence should be addressed. E-mail: yc70@pitt.edu (Y.C.),  
psm9@pitt.edu (P.S.M.)

Published 17 January 2008 on *Science Express*  
DOI: 10.1126/science.1152586

#### **This PDF file includes:**

Materials and Methods  
Figs. S1 to S3  
Tables S1 to S5  
References

## Supporting Online Material (MS#1152586)

### Materials and methods

#### Human tissue samples

Human Merkel cell carcinoma tissues were obtained from the Cooperative Human Tissue Network as frozen excess biopsy samples (Table S1). All MCC tumors except MCC352 were reconfirmed in our laboratory by H&E and cytokeratin 20 immunostaining; of these all except MCC350 were positive for cytokeratin 20. MCC350 represents metastasis to lymph node. Due to sampling issues, we were unable to identify MCC tumor cells in this portion of tissue taken for our examination. We relied on the original pathology report as evidence for MCC. Four cases (MCC347, MCC337, MCC343, and MCC346) from 4 men ranging in age from 38 to 84 years were used for DTS analysis. Control samples were collected from excess surgical tissues as a consecutive series of anonymized pathology collections from a single operating day or collected from ongoing studies of Kaposi's sarcoma (Table S2). All tissues were tested under University of Pittsburgh IRB exemption status for anonymous excess pathology tissues not required for patient diagnosis.

#### Generation of cDNA library for pyrosequencing

Total RNA was extracted from MCC tissues using RNeasy Midi Kit (Qiagen, Alameda, CA) and treated with DNase I (Ambion, Austin, TX) to remove genomic DNA. Integrity of tissue RNAs was analyzed by an Agilent 2100 bioanalyzer (Quantum Analytics, Foster City, CA) using the RNA 6000 Nano Reagent Kit. mRNA was purified with Dynabeads® mRNA Purification Kit (Invitrogen). Double strand cDNA was synthesized with oligo(dT) primer using the SuperScript™ Double-stranded cDNA Synthesis Kit (Invitrogen). Five micrograms of MCC cDNA was used for pyrosequencing after confirming cDNA quality on an Agilent bioanalyzer (Quantum Analytics) at 454 Life Sciences (Roche). The cDNA sample was fractionated (300-500 bp) and blunted for ligation with two different adaptors. These two adaptors provide unique priming sequences for both amplification and sequencing, and form the basis of the single-strand template library for pyrosequencing (*S1*). Sequencing was performed on two cDNA libraries: one library from a single case (MCC347) and another library of three pooled cases (MCC337, 343 and 346).

#### Digital Transcriptome Subtraction

The sequence data was first trimmed using LUCY (*S2*) with stringency similar to Phred scores of 20 or higher (-error 0.01 0.01), and long reads over 50 bp (-m 50). Only high quality sequences obtained after Lucy trimming were used for further subtraction with SeqClean (<http://compbio.dfci.harvard.edu/tgi/software/>). First, poly(A/T), dust (low-complexity), human repeat (<http://www.girinst.org>) and adaptor sequences were removed to obtain a high fidelity (HiFi) dataset. These HiFi sequences were then aligned against human databases, including human RefSeq RNA ([ftp://ftp.ncbi.nih.gov/refseq/H\\_sapiens/mRNA\\_Prot](ftp://ftp.ncbi.nih.gov/refseq/H_sapiens/mRNA_Prot)), mitochondrial and assembled chromosomes ([ftp://ftp.ncbi.nih.gov/refseq/H\\_sapiens/H\\_sapiens](ftp://ftp.ncbi.nih.gov/refseq/H_sapiens/H_sapiens)), and human immunoglobulin variable sequences (<ftp://ftp.ncbi.nih.gov/blast/db/FASTA>) with a minimum hit length of 30 bp (-x 95). The remaining candidate sequences were then aligned to online GenBank nonredundant (NR) using BLASTX program in the netblast package (<ftp://ftp.ncbi.nih.gov/blast/executables/>). DTS analysis was performed using stand-alone executables on a Mac Pro (Apple, Cupertino CA).

#### RACE analysis on MCV transcripts

Both rapid amplification of 5'- and 3'- cDNA ends (RACE) were performed on MCC347 and MCC348 with GeneRacer Kit (Invitrogen) according to the manufacturer's instructions. Primers used for RACE are listed in Table S3. Primer M1L and M3 were used in 5'-RACE. Primer M2L and M4

were used in 3'-RACE. The PCR fragments were isolated from agarose gels, extracted with QIAEX II Gel Extraction Kit (Qiagen), and ligated into pCR 2.1 vector (Invitrogen) for DNA sequencing.

### **Consensus PCR for VP1**

Consensus PCR on the polyomavirus VP1 region was performed as previously described (S3). Genomic DNAs from MCC339, MCC344, MCC347, and MCC350 were PCR amplified using Platinum Taq DNA polymerase (Invitrogen) with VP1 consensus primers VP1-1 as in Table S3. Cycling conditions for the first PCR were 5 min at 95 °C, followed by 45 cycles each of 94 °C for 30 sec, 46 °C for 1 min and 72 °C for 1 min, and final elongation at 72 °C for 10 min. Nested PCR was performed with consensus VP1-2 primers (Table S3) using 4 µl of the first PCR product as template in a similar reaction at 95 °C for 5 min, 45 cycles of 94 °C for 30 sec, 56 °C for 30 min and 72 °C for 30 sec, and 72 °C for 10 min. PCR fragments were recovered from agarose gel, cloned in pCR2.1 cloning vector (Invitrogen) and sequenced. Based on the sequencing results, specific primers (VP1-iF and VP1-iR) were designed in the MCV350 VP1 region.

### **MCV genome sequencing**

Primers for genome sequencing are listed in Table S4. The viral genome was bi-directionally sequenced with >3 fold bidirectional coverage. First, successive outward PCR was performed from the 3' end of the T antigen sequence to a conserved VP1 site with primers M6 and VP1-iR, and from the 5' end of the T antigen sequences to a conserved VP1 site with primers M5 and VP1-iF. Walking primers (W1-W10) were then designed to sequence the long PCR products. This sequence data was finally used to design 13 PCR primer sets (contig1-contig13) that encircle the genome. These PCR products were used for confirmatory second and third sequencing rounds. All PCR reactions were performed with High Fidelity Platinum Taq DNA polymerase (Invitrogen).

### **MCV detection by PCR-Southern blotting**

Genomic DNA was extracted by standard phenol-chloroform method and DNA quality was confirmed by  $\beta$ -actin PCR. One hundred nanograms of genomic DNA was amplified using Taq DNA polymerase (Invitrogen) in a final volume of 50 µl. Cycling conditions were 3 min at 94 °C, followed by 31 cycles each of 94 °C for 45 sec, 58 °C for 30 sec and 72 °C for 45 sec, and final elongation of 15 min at 72 °C. PCR primers are listed in Table S5. PCR of the T antigen locus was performed with LT1 and LT3 primer sets (internal Southern probes were generated with M1-M2 and LT5, respectively) and for the VP1 gene with VP1 primer set (internal probe generated with VP1.3). Absence of MCV genome in MCC343 and 346 was confirmed using genomic 13 PCR primer sets contig1-contig13 (Table S4). Southern blotting for PCR products was performed as described below for genomic Southern blotting, using 15 µl of the 50µl PCR reaction product as the starting DNA and electrophoresis on 1% agarose gels.

To avoid potential contamination of template DNA, PCR mixtures were prepared in an isolated room and template DNA was prepared in an UV-irradiated clean hood. Recombinant DNA harboring MCV DNA sequence was not amplified at the same time as tissue samples to avoid cross contamination between PCR samples. Negative PCR controls contained all components except DNA template. All samples including control samples were randomized and blinded to the scientist performing PCR-Southern throughout testing. Fisher exact 2-tailed tests were used to compare positivity rates between groups.

### **Genomic Southern blotting for MCV and *PTPRG***

Genomic Southern probes were generated by PCR using primers listed in Table S5. Genomic Southern blotting for virus monoclonality was performed on fifteen micrograms of control or tumor DNA, digested overnight with 60 units of EcoRI or BamHI (New England Biolabs, Ipswich MA).

Genomic Southern blotting for cellular monoclonality was performed with 10 micrograms of control or tumor DNA digested with 100 units NheI and 100 units SacI (New England Biolabs) overnight. DNA digestions were separated on 0.7% agarose gels at 80 volts with ethidium bromide staining to confirm complete digestion. Digested genomic DNA was then transferred onto a nitrocellulose membrane (Amersham) with 10x SSC (S4). Membranes were hybridized with probe overnight at 42 °C and rinsed in 0.2x SSC with 0.5% SDS at 60 °C for MCV probes, and 72 °C for the Chr 3 probe in the *PTPRG* gene. Probes were labeled with [ $\alpha$ <sup>32</sup>P] dCTP ( $\sim 3 \times 10^7$  dpm/ml) using the Readiprime II Random Prime Labelling System (Amersham). MCV DNA probes (LT1, LT2, P1, P3, P6, P9, and P12) covering 3.2 kb of non-overlapping MCV350 genome (Fig. S3) were combined for Southern blot detection of MCV genome.

## Supporting figures

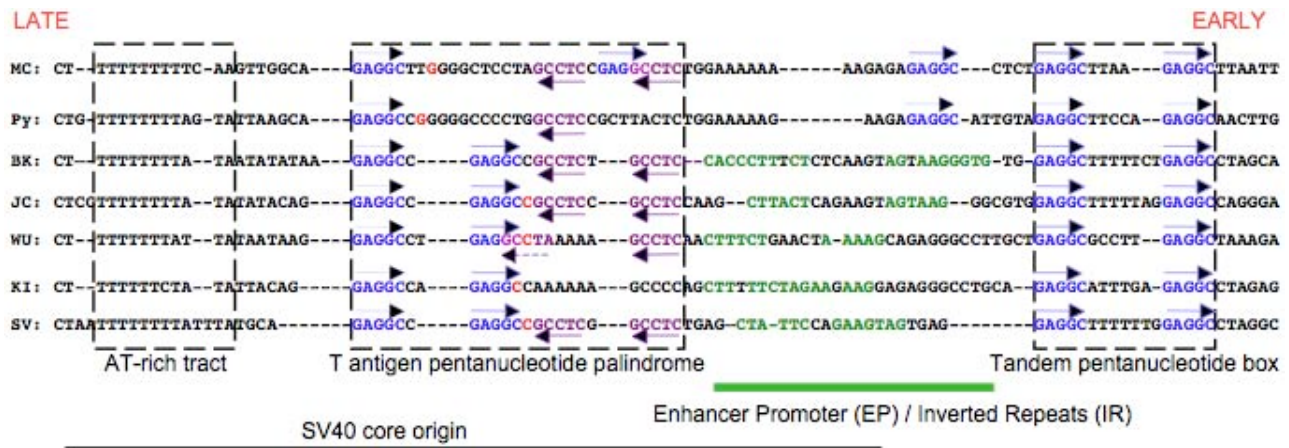

**Figure S1. MCV replication origin sequence is highly conserved with other polyomaviruses.** The MCV350 replication origin (5360-5387 and 1-69 nt) has seven conserved pentameric T antigen-binding sites (forming a pentanucleotide palindrome and a tandem pentanucleotide box), a homopolymeric T tract and semiconserved inverted repeats found in other polyomaviruses. (MC: Merkel Cell polyomavirus, Py: Mouse polyomavirus, BK: human BK polyomavirus, JC: human JC polyomavirus, WU: human WU polyomavirus, KI: human KI polyomavirus, SV: Simian virus 40)

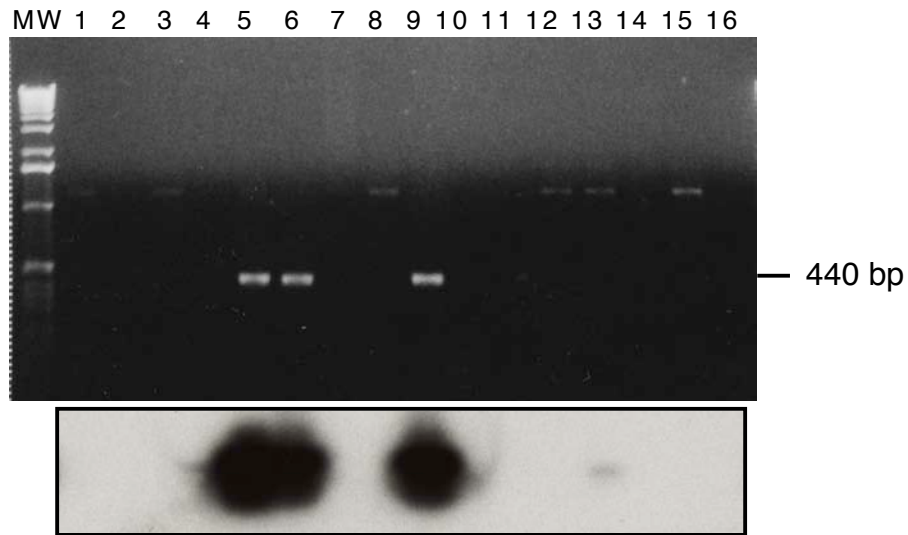

**Figure S2. Representative results of PCR-Southern blotting for detection of MCV in MCC and control tissues.** Samples were tested and scored in a randomized and blinded fashion. Top panel, agarose gel (ethidium bromide) of amplification products using LT1 primers (Table S5). Bottom panel, hybridization of LT1 PCR products to the [ $\alpha^{32}\text{P}$ ]-dCTP-labeled M1-M2 internal probe after transfer of DNA to nitrocellulose membrane. MCC tissue DNA in lanes 1 (MCC346), 5 (MCC348), 6 (MCC344), 9 (MCC339), and 15 (MCC343); DNA-negative control ( $\text{H}_2\text{O}$ ) in lanes 2, 10 and 11; and surgical control tissue DNA in lanes 3, 4, 7, 8, 12, 13, 14 and 16. Lanes 5, 6 and 9 (MCC348, 344 and 339 respectively) show robust signal after both ethidium bromide staining and Southern blotting. The weak signal in lane 13 is from a control gall bladder tissue DNA that is positive only after Southern blotting of the PCR product. MCC346 (lane 1) and 343 (lane 15) are negative (see Text).

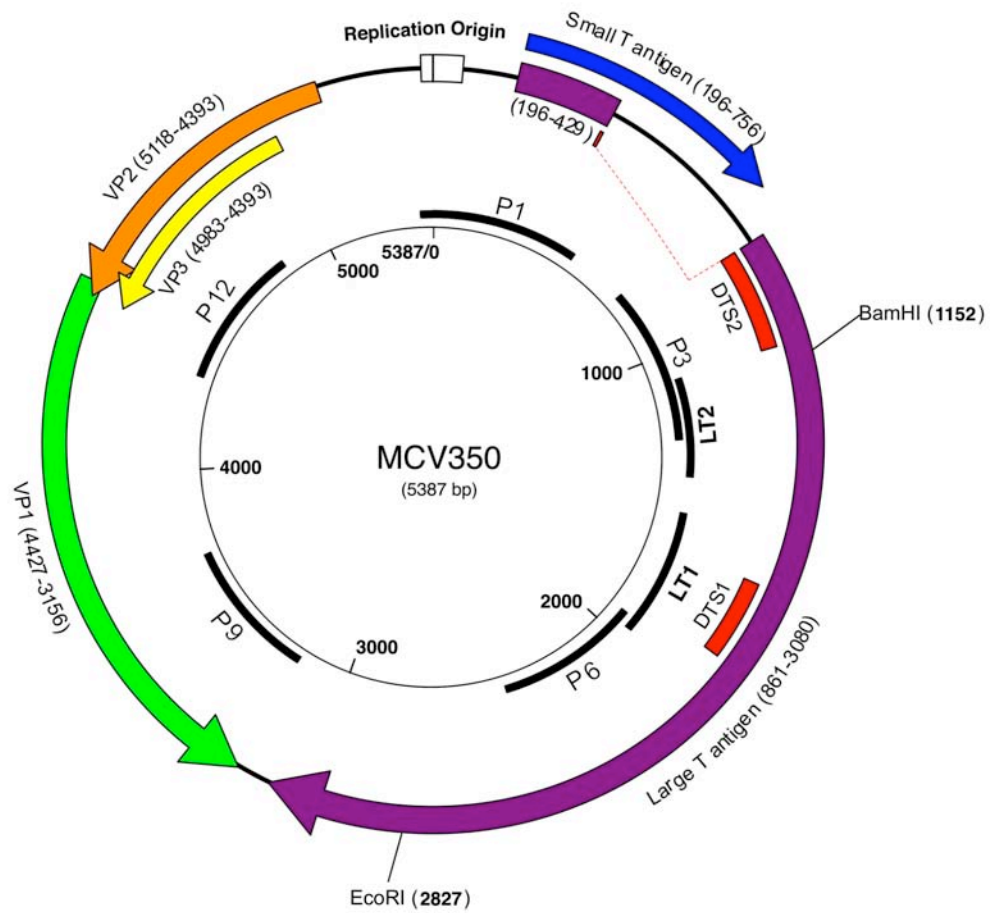

**Figure S3. Positions of the probes used for genomic Southern blotting to detect MCV.** Unless indicated otherwise, all seven probes were used together for MCV detection.

## Supporting tables

**Table S1. Clinicopathological and PCR data for MCC.**

| Patient | Tissue ID | Age | Sex    | Race    | Cytokeratin 20 |
|---------|-----------|-----|--------|---------|----------------|
| 1       | MCC337    | 84  | Male   | White   | +              |
| 2       | MCC338*   | 79  | Male   | White   | +              |
|         | MCC339    |     |        |         | +              |
| 3       | MCC343    | 79  | Male   | White   | +              |
| 4       | MCC344    | 57  | Male   | White   | +              |
| 5       | MCC345    | 77  | Male   | Black   | +              |
| 6       | MCC346    | 38  | Male   | Unknown | +              |
|         | MCC347    |     |        |         | +              |
| 7       | MCC348†   | 56  | Male   | White   | +              |
|         | MCC349    |     |        |         | +              |
| 8       | MCC349    | 58  | Female | White   | +              |
| 9       | MCC350    | 58  | Male   | White   | -              |
| 10      | MCC352    | 58  | Male   | White   | ND‡            |

### PCR Results for MCC Cases (n, 10)

| Patient              | Tissue ID | LT1      | LT3       | VP1       | Summary§  |
|----------------------|-----------|----------|-----------|-----------|-----------|
| 1                    | MCC337    | -/+      | -/-       | -/-       | -/+       |
| 2                    | MCC338†   | +/+      | +/+       | +/+       | +/+       |
|                      | MCC339    | +/+      | +/+       | +/+       | +/+       |
| 3                    | MCC343    | -/-      | -/-       | -/-       | -/-       |
| 4                    | MCC344    | +/+      | +/+       | +/+       | +/+       |
| 5                    | MCC345    | -/-      | +/+       | -/-       | +/+       |
| 6                    | MCC346    | -/-      | -/-       | -/-       | -/-       |
|                      | MCC347    | +/+      | +/+       | -/-       | +/+       |
| 7                    | MCC348‡   | +/+      | +/+       | -/-       | +/+       |
|                      | MCC349    | +/+      | +/+       | -/+       | +/+       |
| 9                    | MCC350    | +/+      | +/+       | +/+       | +/+       |
| 10                   | MCC352    | ND       | +/+       | +/+       | +/+       |
| No. of Positives (%) |           | 6/9 (67) | 7/10 (70) | 5/10 (50) | 8/10 (80) |

\* MCC338: Infiltrating tumor in skin tissue adjacent to MCC339 tumor.

† MCC348: Metastatic MCC to lymph node from MCC347.

‡ ND: Not Determined.

§ +/+ : Strongly positive by ethidium bromide staining and Southern hybridization of PCR products with one or more primers.

-/- : Negative for both ethidium bromide staining and Southern hybridization on all primers.

-/+ : Negative by ethidium bromide staining but positive after Southern hybridization of PCR products.



**Table S2. Clinicopathological and PCR data for control tissues from various body site and skin tissues.**

| <b>Tissue Type</b>                           | <b>Total No. (No. MCV positive)*</b> |
|----------------------------------------------|--------------------------------------|
| -----<br>Various Body Site Controls<br>----- |                                      |
| Colon                                        | 5                                    |
| Small Bowel                                  | 3 (1)                                |
| Hemorrhoid                                   | 1 (1)                                |
| Gall Bladder                                 | 7 (1)                                |
| Appendix                                     | 9 (2)                                |
| Mouth                                        | 1                                    |
| Vein                                         | 2                                    |
| Heart                                        | 1                                    |
| Kidney                                       | 1                                    |
| Skin                                         | 9                                    |
| Hernia                                       | 2                                    |
|                                              |                                      |
| Hematolymphoid tissues                       |                                      |
| Lymph node                                   | 1                                    |
| Tonsil                                       | 5                                    |
| B cell CLL                                   | 1                                    |
| Myeloid hyperplasia                          | 1                                    |
| Posttransplant lymphoma                      | 1                                    |
| HIV+ large cell lymphoma                     | 1                                    |
|                                              |                                      |
| Miscellaneous tissues                        |                                      |
| Lipoma                                       | 1                                    |
| Fibrous tissue                               | 2                                    |
| Fistula track                                | 1                                    |
| Meningioma                                   | 1                                    |
| Breast cancer                                | 1                                    |
| Lung cancer                                  | 1                                    |
| Prostate                                     | 1                                    |
|                                              |                                      |
| -----<br>Skin Tissue Controls<br>-----       |                                      |
| Normal skin (1 HIV+)                         | 6 (1)†                               |
| Kaposi's sarcoma (4 HIV+)                    | 15 (3)†                              |
| Malignant Melanoma                           | 1                                    |
| Inflammatory Skin                            | 3                                    |

**PCR Results for Comparison Control Tissues (n, 84)**

| <b>Positive Tissues Only</b> | <b>LT1</b> | <b>LT3</b> | <b>VP1</b> | <b>Summary‡</b> |
|------------------------------|------------|------------|------------|-----------------|
| -----                        |            |            |            |                 |
| Various Body Sites (n, 59)   |            |            |            |                 |
| Appendix                     | -/+        | -/+        | -/+        | -/+             |
| Appendix                     | -/-        | -/+        | -/+        | -/+             |
| Gall Bladder                 | -/+        | -/-        | -/-        | -/+             |
| Bowel                        | -/-        | -/+        | -/+        | -/+             |
| Hemorrhoid                   | -/-        | -/-        | -/+        | -/+             |
|                              |            |            |            |                 |
| Skin or Skin Tumors (n, 25)  |            |            |            |                 |
| Skin                         | -/+        | ND         | -/+        | -/+             |
| KS skin tumor                | -/+        | ND         | -/+        | -/+             |
| KS skin tumor                | -/+        | ND         | -/-        | -/+             |
| KS skin tumor                | -/-        | ND         | -/+        | -/+             |

\* Each tissue sample from a single patient.

† None of the samples from HIV+ patients were positive for MCV.

‡ -/+ : Negative by ethidium bromide staining but positive after Southern hybridization of PCR products on one or more primers.

**Table S3. Primers used for the MCV cloning.**

| Name   | Nucleotide position* | Purpose           | Sequence                        |
|--------|----------------------|-------------------|---------------------------------|
| M1L    | 1894-1864            | 5'-RACE           | TTCTCTTGCAGTAATTTGTAAGGGGACTTAC |
| M3     | 1848-1827            | 5'-RACE           | TTTCAGGCATCTTATTCACTCC          |
| M2L    | 1707-1734            | 3'-RACE           | AGCAGGCATGCCTGTGAATTAGGATGTA    |
| M4     | 1784-1805            | 3'-RACE           | TTTTTGCTCTACCTTCTGCACT          |
| -----  |                      |                   |                                 |
| VP1-1F |                      | VP1 Consensus PCR | CCAGACCCAACTARRAATGARAA         |
| VP1-1R |                      | VP1 Consensus PCR | AACAAGAGACACAAATNTTTCCNCC       |
| VP1-2F |                      | VP1 Consensus PCR | ATGAAAATGGGGTTGGCCCNCTNTGYAARG  |
| VP1-2R |                      | VP1 Consensus PCR | CCCTCATAAACCCGAACYTCYTCHACYTG   |
| -----  |                      |                   |                                 |
| M6     | 1827-1848            | Genome Cloning    | GGAGTGAATAAGATGCCTGAAA          |
| VP1-iR | 3480-3461            | Genome Cloning    | ATGGGTGAAAAACCCCTACC            |
| M5     | 1796-1770            | Genome Cloning    | GGTAGAGCAAAAATTCTTAATAGCAGA     |
| VP1-iF | 3508-3527            | Genome Cloning    | CTAGGCAACCCATGAAGAGC            |

\*Nucleotide position is based on MCV350 genome.

**Table S4. Primers used for genome sequencing.**

| Name      | Nucleotide position* | Purpose             | Sequence                 |
|-----------|----------------------|---------------------|--------------------------|
| W1        | 411-4130             | Primer walking      | ACTCTTGCCACACTGTAAGC     |
| W2        | 1290-1272            | Primer walking      | CAGGGGAGGAAAGTGATTC      |
| W3        | 4268-4288            | Primer walking      | GGGTAATGCTATCTTCTCCAG    |
| W4        | 946-929              | Primer walking      | TATTCGTATGCCTTCCCG       |
| W5        | 4293-4316            | Primer walking      | CACAGATAATACTTCCACTCCTCC |
| W7        | 5260-5278            | Primer walking      | TTATCAGTCAAACCTCCGCC     |
| W8        | 5294-5312            | Primer walking      | TCAATGCCAGAAACCTGTC      |
| W9        | 166-148              | Primer walking      | AACAGCAGAGGAGCAAATG      |
| W10       | 96-78                | Primer walking      | TCTGCCCTTAGATACTGCC      |
| contig1f  | 5344-5363            | overlapping contigs | TTGGCTGCCTAGGTGACTTT     |
| contig1r  | 518-499              | overlapping contigs | CCAGGACCTCTGCAAAATCT     |
| contig2f  | 354-373              | overlapping contigs | GGAATTGAACACCCTTTGGA     |
| contig2r  | 879-860              | overlapping contigs | ATATAGGGGCCTCGTCAACC     |
| contig3f  | 730-749              | overlapping contigs | TGCTTACTGCATCTGCACCT     |
| contig3r  | 1287-1268            | overlapping contigs | GGGAGGAAAGTGATTCATCG     |
| contig4f  | 1132-1151            | overlapping contigs | AGGAACCCACCTCATCCTCT     |
| contig4r  | 1641-1619            | overlapping contigs | AAATGGCAAAACAACCTTACTGTT |
| contig5f  | 1538-1561            | overlapping contigs | AAACAACAGAGAACTCCTGTTC   |
| contig5r  | 2088-2069            | overlapping contigs | GAGCCTTGTGAGGTTTGAGG     |
| contig6f  | 1934-1953            | overlapping contigs | AGAGGCCAGCTGTAATTGGA     |
| contig6r  | 2437-2418            | overlapping contigs | GCAGCAAAGCTTGTTTTTCC     |
| contig7f  | 2328-2349            | overlapping contigs | TTTGAAAAGAAGCTGCAGAAAA   |
| contig7r  | 2885-2866            | overlapping contigs | TGTATCAGGCAAGCACCAAA     |
| contig8f  | 2763-2783            | overlapping contigs | CACTTTTCCCAAAGGCAAAT     |
| contig8r  | 3282-3263            | overlapping contigs | TTACCCAAAGCCCTCTGTTG     |
| contig9f  | 3187-3206            | overlapping contigs | GAGGCCTTTTGAGGTCCTTT     |
| contig9r  | 3687-3667            | overlapping contigs | TCAGACAGGCTCTCAGACTCC    |
| contig10f | 3599-3618            | overlapping contigs | ATAGAGGGCCCACTCCATTC     |
| contig10r | 4107-4088            | overlapping contigs | TCTGCCAATGCTAAATGAGG     |
| contig11f | 3949-3969            | overlapping contigs | CCTGACACAGGAATACCAGCA    |
| contig11r | 4504-4485            | overlapping contigs | GCAAACCTCCAGATTGGCTTC    |
| contig12f | 4329-4349            | overlapping contigs | TTTTGAACTGAGGCAACATT     |
| contig12r | 4829-4810            | overlapping contigs | TAACTGTGGGGGTGAGGTTG     |
| contig13f | 4765-4784            | overlapping contigs | TACCCACGAAACATCCCTGT     |
| contig13r | 5386-5367            | overlapping contigs | AGCCTCTGCCAACTTGAAAA     |

\*Nucleotide position is based on MCV350 genome.

**Table S5. PCR Primers and Probes used for MCV detection.**

| Name                                          | Nucleotide position*    | Sense                  | Antisense                |
|-----------------------------------------------|-------------------------|------------------------|--------------------------|
| Primers for MCV PCR                           |                         |                        |                          |
| LT1                                           | 1514-1953               | TACAAGCACTCCACCAAAGC   | TCCAATTACAGCTGGCCTCT     |
| LT3                                           | 571-879                 | TTGTCTCGCCAGCATTGTAG   | ATATAGGGGCCTCGTCAACC     |
| VP1                                           | 4137-3786               | TTTGCCAGCTTACAGTGTGG   | TGGATCTAGGCCCTGATTTTT    |
| PCR Primers for Southern hybridization Probes |                         |                        |                          |
| M1-M2                                         | 1711- 1889              | GGCATGCCTGTGAATTAGGA   | TTGCAGTAATTTGTAAGGGGACT  |
| LT5                                           | 253-855                 | GCTCCTAATTGTTATGGCAACA | TGGGAAAGTACACAAAATCTGTCA |
| VP1.3                                         | 4107-3599               | TCTGCCAATGCTAAATGAGG   | ATAGAGGGCCCACTCCATTC     |
| P1                                            | 5344-518                | TTGGCTGCCTAGGTGACTTT   | CCAGGACCTCTGCAAAATCT     |
| P3                                            | 730-1287                | TGCTTACTGCATCTGCACCT   | GGGAGGAAAGTGATTCATCG     |
| P6                                            | 1934-2437               | AGAGGCCAGCTGTAATTGGA   | GCAGCAAAGCTTGTTTTTCC     |
| P9                                            | 3187-3687               | GAGGCCTTTTGAGGTCTTTT   | TCAGACAGGCTCTCAGACTCC    |
| P12                                           | 4329-4829               | TTTTGGAAGTGGGCAACATT   | TAACTGTGGGGGTGAGGTTG     |
| LT2                                           | 1054-1428               | CTGGGTATGGGTCCTTCTCA   | TGGTGAAGGAGGAGGATCTG     |
| Chr.3                                         | 61563308 –<br>61563830† | TTTCAGACGGAAGCGAAGTT   | ACCACGATTTGGAAAACAGC     |

\*Nucleotide position is based on MCV350 genome.

† Nucleotide position is based on NT\_022517.17.

## Supporting references

- S1. M. Margulies *et al.*, *Nature* **437**, 376 (2005).
- S2. H. H. Chou, M. H. Holmes, *Bioinformatics* **17**, 1093 (2001).
- S3. R. Johne, D. Enderlein, H. Nieper, H. Muller, *J Virol* **79**, 3883 (2005).
- S4. E. Cesarman, P.S. Moore, P.H. Rao, G. Inghirami, D. M. Knowles, Y. Chang, *Blood* **86**, 2708 (1995).
